# Supplementary material for: Anticonvulsants for behavioral and psychological symptoms in dementia: protocol for a systematic review
Source: Springer Nature journal article supplement (doi:10.1186/s13643-019-1025-5), 2019-05-18
Supplement: MOESM1 [file 16733558]

Database: OVID Medline Epub Ahead of Print, In-Process & Other Non-Indexed Citations, Ovid MEDLINE(R) Daily and Ovid MEDLINE(R) 1946 to Present  
Search Strategy:

-----  
1 exp Dementia/ (144033)  
2 dement\*.ti,ab,kf. (96495)  
3 alzheimer\*.ti,ab,kf. (123728)  
4 huntington\*.ti,ab,kf. (15746)  
5 lewy bod\*.ti,ab,kf. (7811)  
6 (cognit\* adj2 (declin\* or deficit\* or impair\*)).ti,ab,kf. (85446)  
7 (creutzfeldt\* or binswanger\* or korsakoff\* or wernicke\*).ti,ab,kf. (10630)  
8 or/1-7 (280873)  
9 exp Anticonvulsants/ (130268)  
10 (anticonvuls\* or antiepileptic\*).ti,ab,kf. (42216)  
11 Acetazolamide\*.ti,ab,kf. (6665)  
12 Bromide\*.ti,ab,kf. (49264)  
13 Carbamazepine\*.ti,ab,kf. (13701)  
14 Chlormethiazole.ti,ab,kf. (442)  
15 Clonazepam\*.ti,ab,kf. (3425)  
16 Clorazepate Dipotassium.ti,ab,kf. (71)  
17 Diazepam\*.ti,ab,kf. (19071)  
18 Dimethadione\*.ti,ab,kf. (101)  
19 Estazolam\*.ti,ab,kf. (191)  
20 Ethosuximide\*.ti,ab,kf. (1194)  
21 Flunarizine\*.ti,ab,kf. (1588)  
22 Lorazepam\*.ti,ab,kf. (3480)  
23 Magnesium Sulfate\*.ti,ab,kf. (3491)  
24 Medazepam\*.ti,ab,kf. (216)  
25 Mephenytoin\*.ti,ab,kf. (845)  
26 Mephobarbital\*.ti,ab,kf. (89)  
27 Meprobamate\*.ti,ab,kf. (1788)  
28 Nitrazepam\*.ti,ab,kf. (976)  
29 Paraldehyde\*.ti,ab,kf. (372)  
30 Phenobarbital\*.ti,ab,kf. (16643)  
31 Phenytoin\*.ti,ab,kf. (11142)  
32 Pregabalin\*.ti,ab,kf. (2746)  
33 Primidone\*.ti,ab,kf. (1134)  
34 Riluzole\*.ti,ab,kf. (1312)  
35 Thiopental\*.ti,ab,kf. (4949)  
36 Tiletamine\*.ti,ab,kf. (344)  
37 Trimethadione\*.ti,ab,kf. (353)  
38 Valproic Acid\*.ti,ab,kf. (7624)  
39 Vigabatrin\*.ti,ab,kf. (1828)  
40 Gabapentin\*.ti,ab,kf. (5517)  
41 Topiramate\*.ti,ab,kf. (4133)  
42 Levetiracetam\*.ti,ab,kf. (3022)  
43 Zonisamine\*.ti,ab,kf. (0)  
44 Oxcarbazepine\*.ti,ab,kf. (1733)  
45 (clobazam or lacosamide or rufinamide or stiripentol or divalproex or felbamate or tiagabine or brivaracetam or eslicarbazepine or ethotoin or trimethadione).ti,ab,kf. (4471)  
46 Trimethadione/ (487)  
47 or/9-46 (221033)  
48 8 and 47 (3256)  
49 Psychomotor Agitation/ (4671)  
50 exp Aggression/ (34091)  
51 (agitat\* or aggress\* or hitting or kicking or grabbing or pushing or throwing or biting or scratching or spitting or hurting or wandering or falling or hoarding or

restless\* or screaming or cursing or complaining).ti,ab,kf. (262345)  
52 49 or 50 or 51 (278276)  
53 48 and 52 (332)

\*\*\*\*\*

1.  
Sequential drug treatment algorithm for agitation and aggression in Alzheimer's and mixed dementia.  
Davies SJ; Burhan AM; Kim D; Gerretsen P; Graff-Guerrero A; Woo VL; Kumar S; Colman S; Pollock BG; Mulsant BH; Rajji TK.  
Journal of Psychopharmacology. 269881117744996, 2018 Jan 01.  
[Journal Article]  
UI: 29338602  
Authors Full Name  
Davies, Simon Jc; Burhan, Amer M; Kim, Donna; Gerretsen, Philip; Graff-Guerrero, Ariel; Woo, Vincent L; Kumar, Sanjeev; Colman, Sarah; Pollock, Bruce G; Mulsant, Benoit H; Rajji, Tarek K.
